# Supplementary material for: Dittrichia graveolens (L.) Greuter, a Rapidly Spreading Invasive Plant: Chemistry and Bioactivity
Source: MDPI journal article supplement (doi:10.3390/molecules27030895), 2022-01-28
Supplement: s1 [file s1]

**Table S1.** Bioactive metabolites identified in *Dittrichia graveolens* L.

| PHENOLIC COMPOUNDS AND DERIVATIVES                             |                                                |                                                                                      |                                         |
|----------------------------------------------------------------|------------------------------------------------|--------------------------------------------------------------------------------------|-----------------------------------------|
| Compound                                                       | Formula                                        | Structure                                                                            | Part of <i>Dittrichia graveolens</i> L. |
| 1 Acetophenone                                                 | C <sub>8</sub> H <sub>8</sub> O                | 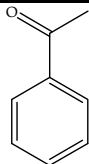   | Essential oil [28, 29]                  |
| 2 Acetophenone, 4-methyl                                       | C <sub>9</sub> H <sub>10</sub> O               |    | Essential oil [19]                      |
| 3 Benzoic acid, 4-OH<br>(syn. Benzoic acid, <i>p</i> -hydroxy) | C <sub>7</sub> H <sub>6</sub> O <sub>3</sub>   |   | Aerial parts [17]<br>Leaves [32]        |
| 4 Benzoic acid derivative 1                                    | C <sub>12</sub> H <sub>14</sub> O <sub>3</sub> |  | Aerial parts [15]                       |
| 5 Benzoic acid derivative 2                                    | C <sub>12</sub> H <sub>14</sub> O <sub>4</sub> |  | Aerial parts [15]                       |
| 6 Benzyl salicylate                                            | C <sub>14</sub> H <sub>12</sub> O <sub>3</sub> |  | Essential oil [26]                      |
| 7 Chlorogenic acid                                             | C <sub>16</sub> H <sub>18</sub> O <sub>9</sub> |  | Leaves [32]                             |
| 8 <i>p</i> -Coumaric acid                                      | C <sub>9</sub> H <sub>8</sub> O <sub>3</sub>   |  | Leaves [32]                             |

## PHENOLIC COMPOUNDS AND DERIVATIVES

|    | Compound                      | Formula                                         | Structure                                                                            | Part of <i>Dittrichia graveolens</i> L. |
|----|-------------------------------|-------------------------------------------------|--------------------------------------------------------------------------------------|-----------------------------------------|
| 9  | Eugenol                       | C <sub>10</sub> H <sub>12</sub> O <sub>2</sub>  | 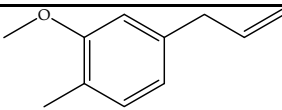   | Essential oil [16]                      |
| 10 | ( <i>E</i> )- $\beta$ -Ionone | C <sub>13</sub> H <sub>20</sub> O               |    | Essential oil [19, 28]                  |
| 11 | Protocatechuic acid           | C <sub>7</sub> H <sub>6</sub> O <sub>4</sub>    |    | Leaves [32]                             |
| 12 | Salicylic acid                | C <sub>7</sub> H <sub>6</sub> O <sub>3</sub>    |   | Leaves [32]                             |
| 13 | Tannic acid                   | C <sub>76</sub> H <sub>52</sub> O <sub>46</sub> |  | Leaves [32]                             |
| 14 | Quinic acid                   | C <sub>7</sub> H <sub>12</sub> O <sub>6</sub>   |  | Leaves [32]                             |

## FLAVONOIDS AND DERIVATIVES

|    | Compound     | Formula                                        | Structure                                                                            | Part of <i>Dittrichia graveolens</i> L. |
|----|--------------|------------------------------------------------|--------------------------------------------------------------------------------------|-----------------------------------------|
| 15 | Aromadendrin | C <sub>15</sub> H <sub>12</sub> O <sub>6</sub> | 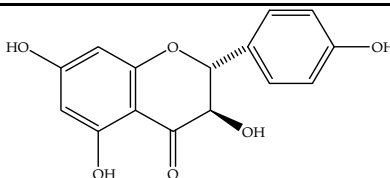 | Aerial parts [17]                       |

## FLAVONOIDS AND DERIVATIVES

|    | Compound                                                | Formula              | Structure | Part of <i>Dittrichia graveolens</i> L.                      |
|----|---------------------------------------------------------|----------------------|-----------|--------------------------------------------------------------|
| 16 | Aromadendrin, 3- <i>epi</i> -acetyl-7- <i>O</i> -methyl | $C_{18}H_{16}O_6$    |           | Aerial parts [17]                                            |
| 17 | Aromadendrin, 3- <i>O</i> -acetyl-7- <i>O</i> -methyl   | $C_{18}H_{16}O_7$    |           | Aerial parts [17]                                            |
| 18 | Aromadendrin, 7- <i>O</i> -methyl                       | $C_{16}H_{14}O_6$    |           | Aerial parts [17]                                            |
| 19 | Catechin                                                | $C_{15}H_{14}O_6$    |           | Aqueous residue of leaves and flowers hydrodistillation [11] |
| 20 | Hesperetin                                              | $C_{16}H_{14}O_6$    |           | Leaves [32]                                                  |
| 21 | Hyperoside                                              | $C_{21}H_{20}O_{12}$ |           | Leaves [32]                                                  |
| 22 | Kaempferol                                              | $C_{15}H_{12}O_6$    |           | Aerial parts [17]                                            |

| FLAVONOIDS AND DERIVATIVES |                                         |                       |                                                                                      |                                                                             |
|----------------------------|-----------------------------------------|-----------------------|--------------------------------------------------------------------------------------|-----------------------------------------------------------------------------|
| Compound                   | Formula                                 | Structure             | Part of <i>Dittrichia graveolens</i> L.                                              |                                                                             |
| 23                         | Kaempferol, 3-methyl ether              | <chem>C16H14O6</chem> | 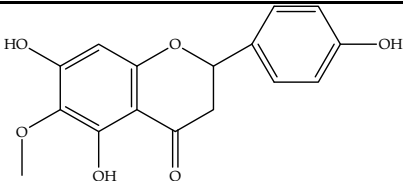   | Aerial parts [17]                                                           |
| 24                         | Kaempferol, 6-hydroxy-3,6-dimethylether | <chem>C17H16O7</chem> |    | Aerial parts [17]                                                           |
| 25                         | Padmatin                                | <chem>C16H14O7</chem> |    | Aerial parts [17]                                                           |
| 26                         | Padmatin, 3- <i>epi</i>                 | <chem>C16H16O6</chem> |   | Aerial parts [17]                                                           |
| 27                         | Padmatin, 3- <i>O</i> -acetyl           | <chem>C18H16O8</chem> |  | Aerial parts [17]                                                           |
| 28                         | Quercetin                               | <chem>C15H10O7</chem> |  | Aqueous residue of leaves and flowers hydrodistillation [11]<br>Leaves [32] |
| 29                         | Sakuranetin                             | <chem>C16H14O5</chem> |  | Aerial parts [17]                                                           |
| 30                         | Scutellarein, 6-methylether             | <chem>C16H14O6</chem> |  | Aerial parts [17]                                                           |

## FLAVONOIDS AND DERIVATIVES

| Compound | Formula               | Structure             | Part of <i>Dittrichia graveolens</i> L. |
|----------|-----------------------|-----------------------|-----------------------------------------|
| 31       | Taxifolin, 3-O-acetyl | <chem>C17H14O8</chem> | Aerial parts [17]                       |

## TERPENES AND DERIVATIVES

| Compound | Formula                   | Structure            | Part of <i>Dittrichia graveolens</i> L.                                 |
|----------|---------------------------|----------------------|-------------------------------------------------------------------------|
| 32       | 4- <i>epi</i> Abietol     | <chem>C20H30</chem>  | Essential oil [30]                                                      |
| 33       | Chrysanthenone            | <chem>C10H14O</chem> | Essential oil [20]                                                      |
| 34       | Laurenene                 | <chem>C20H32</chem>  | Essential oil [25]                                                      |
| 35       | Longipinanol              | <chem>C15H26O</chem> | Essential oil [25]<br>Supercritical fluid extraction (SFE) extract [25] |
| 36       | Pinocarvone               | <chem>C10H14O</chem> | Essential oil [10]                                                      |
| 37       | <i>trans</i> -Pinocarveol | <chem>C10H16O</chem> | Essential oil [10, 20]                                                  |

| MONOTERPENES AND DERIVATIVES |                           |                                                |                                                                                      |                                                                         |
|------------------------------|---------------------------|------------------------------------------------|--------------------------------------------------------------------------------------|-------------------------------------------------------------------------|
|                              | Compound                  | Formula                                        | Structure                                                                            | Part of <i>Dittrichia graveolens</i> L.                                 |
| 38                           | Artemisia alcohol         | C <sub>10</sub> H <sub>18</sub> O              | 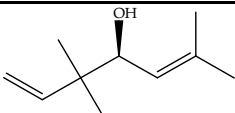   | Essential oil [19, 29]                                                  |
| 39                           | $\beta$ -Bisabolenal      | C <sub>14</sub> H <sub>22</sub> O              |    | Essential oil [25]<br>Supercritical fluid extraction (SFE) extract [25] |
| 40                           | Borneol                   | C <sub>10</sub> H <sub>18</sub> O              |   | Essential oil [10, 19-24, 26-30]                                        |
| 41                           | Bornyl acetate            | C <sub>12</sub> H <sub>20</sub> O <sub>2</sub> |  | Essential oil [10, 18, 19, 21-24, 26, 28-30]                            |
| 42                           | <i>iso</i> Bornyl acetate | C <sub>12</sub> H <sub>20</sub> O <sub>2</sub> |  | Essential oil [20]                                                      |
| 43                           | <i>iso</i> Bornyl formate | C <sub>11</sub> H <sub>18</sub> O <sub>2</sub> |  | Essential oil [28]                                                      |

| MONOTERPENES AND DERIVATIVES |                                                |                       |                                                   |
|------------------------------|------------------------------------------------|-----------------------|---------------------------------------------------|
| Compound                     | Formula                                        | Structure             | Part of <i>Dittrichia graveolens</i> L.           |
| 44                           | <i>iso</i> Bornyl isobutyrate, 8-isobutyryloxy | <chem>C18H30O4</chem> | Supercritical fluid extraction (SFE) extract [25] |
| 45                           | <i>iso</i> Bornyl isovalerate                  | <chem>C15H26O2</chem> | Essential oil [28]                                |
| 46                           | <i>iso</i> Bornyl propanoate                   | <chem>C13H22O2</chem> | Essential oil [23, 28]                            |
| 47                           | Camphene                                       | <chem>C10H16</chem>   | Essential oil [19-24, 28-30]                      |
| 48                           | Camphene hydrate                               | <chem>C10H18O</chem>  | Essential oil [19, 20, 27]                        |
| 49                           | Camphor                                        | <chem>C10H16O</chem>  | Essential oil [19, 20, 23, 27-30]                 |
| 50                           | $\delta$ -2-Carene                             | <chem>C10H16</chem>   | Essential oil [24]                                |

| MONOTERPENES AND DERIVATIVES |                                                        |                      |  | Part of <i>Dittrichia graveolens</i> L.                                                 |
|------------------------------|--------------------------------------------------------|----------------------|--|-----------------------------------------------------------------------------------------|
| Compound                     | Formula                                                | Structure            |  |                                                                                         |
| 51                           | Carvacrol                                              | <chem>C10H14O</chem> |  | Essential oil [19]                                                                      |
| 52                           | Carveol                                                | <chem>C10H16O</chem> |  | Essential oil [30]                                                                      |
| 53                           | <i>cis</i> -Carveol                                    | <chem>C10H16O</chem> |  | Supercritical fluid extraction (SFE) extract [25]                                       |
| 54                           | Carvone                                                | <chem>C10H14O</chem> |  | Essential oil [19]                                                                      |
| 55                           | Cineole, 1,8<br>(syn. Eucalyptol)                      | <chem>C10H18O</chem> |  | Essential oil [10, 16, 20, 21, 30]<br>Supercritical fluid extraction (SFE) extract [25] |
| 56                           | Cineole, 1,8-dehydro<br>(syn. Cineol, 2,3-dehydro-1,8) | <chem>C10H16O</chem> |  | Essential oil [19, 20, 24, 28, 29]<br>Supercritical fluid extraction (SFE) extract [25] |
| 57                           | $\beta$ -Cyclocitral                                   | <chem>C10H16O</chem> |  | Essential oil [28]                                                                      |
| 58                           | <i>p</i> -Cymen-8-ol                                   | <chem>C10H14O</chem> |  | Essential oil [19, 28]                                                                  |



| MONOTERPENES AND DERIVATIVES |                                    |                                             |                                         |
|------------------------------|------------------------------------|---------------------------------------------|-----------------------------------------|
| Compound                     | Formula                            | Structure                                   | Part of <i>Dittrichia graveolens</i> L. |
| 59                           | <i>p</i> -Cymen-9-ol               | <chem>C1=CC=C(C=C1)C(C)C(O)C</chem>         | Essential oil [20]                      |
| 60                           | <i>m</i> -Cymene                   | <chem>CC1=CC=C(C=C1)C(C)C</chem>            | Essential oil [28]                      |
| 61                           | <i>p</i> -Cymene                   | <chem>CC1=CC=C(C=C1)C(C)C</chem>            | Essential oil [10, 19, 23, 28, 29]      |
| 62                           | <i>p</i> -Cymenene                 | <chem>CC1=CC=C(C=C1)C(C)=C</chem>           | Essential oil [19, 23, 29]              |
| 63                           | ( <i>E</i> )- $\beta$ -Damascenone | <chem>CC1=C(C)C(=C(C)C1)C(=O)C=C</chem>     | Essential oil [23, 28]                  |
| 64                           | Fenchol                            | <chem>CC12CCC3C1(C)CCC4C3(C)CC(C4)O</chem>  | Essential oil [10, 19]                  |
| 65                           | <i>Exo</i> -Fenchyl alcohol        | <chem>CC12CCC3C1(C)CCC4C3(C)CC(C4)O</chem>  | Essential oil [20]                      |
| 66                           | Geranyl acetone                    | <chem>CC(=O)CCC/C=C/C(C)CC/C=C/C(C)C</chem> | Essential oil [19, 28]                  |
| 67                           | <i>neo</i> -Isothujan-3-ol         | <chem>CC12CCC3C1(C)CCC4C3(C)CC(C4)O</chem>  | Essential oil [28]                      |

| MONOTERPENES AND DERIVATIVES |                                                   |                                                |                                                                                      |                                         |
|------------------------------|---------------------------------------------------|------------------------------------------------|--------------------------------------------------------------------------------------|-----------------------------------------|
|                              | Compound                                          | Formula                                        | Structure                                                                            | Part of <i>Dittrichia graveolens</i> L. |
| 68                           | Lavandulol                                        | C <sub>10</sub> H <sub>18</sub> O              | 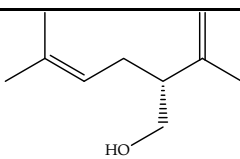   | Essential oil [19]                      |
| 69                           | Lavandulol acetate                                | C <sub>12</sub> H <sub>20</sub> O <sub>3</sub> |    | Essential oil [24]                      |
| 70                           | Limonene                                          | C <sub>10</sub> H <sub>16</sub>                |    | Essential oil [19, 22, 23, 28, 29]      |
| 71                           | L-Limonene                                        | C <sub>10</sub> H <sub>16</sub>                |   | Essential oil [20, 30]                  |
| 72                           | Linalool                                          | C <sub>10</sub> H <sub>18</sub> O              |  | Essential oil [10, 19, 23, 29, 30]      |
| 73                           | cis Linalool oxide                                | C <sub>10</sub> H <sub>18</sub> O <sub>2</sub> |  | Essential oil [28]                      |
| 74                           | cis-Linalool oxide, dehydroxy                     | C <sub>10</sub> H <sub>16</sub> O              |  | Essential oil [28]                      |
| 75                           | p-Menth-2-en-1-ol                                 | C <sub>10</sub> H <sub>18</sub> O              |  | Essential oil [20]                      |
| 76                           | p-Mentha-1(7),2-dien-8-ol<br>(β-phellandren-8-ol) | C <sub>10</sub> H <sub>16</sub> O              |  | Essential oil [19]                      |

| MONOTERPENES AND DERIVATIVES |                                                                     |                                     |                                         |
|------------------------------|---------------------------------------------------------------------|-------------------------------------|-----------------------------------------|
| Compound                     | Formula                                                             | Structure                           | Part of <i>Dittrichia graveolens</i> L. |
| 77                           | <i>trans-p</i> -Mentha-1(7),8-dien-2-ol                             | <chem>C1=CC(C=C(C1)O)C=C</chem>     | Essential oil [28]                      |
| 78                           | <i>p</i> -Mentha-1,5-dien-8-ol<br>(syn. $\alpha$ -Phellandren-8-ol) | <chem>CC(C)(O)C1=CC=CC=C1C=C</chem> | Essential oil [19, 20]                  |
| 79                           | Myrcene                                                             | <chem>CC(C)=CC(=C)C=C</chem>        | Essential oil [10, 19, 26]              |
| 80                           | Myrtenal                                                            | <chem>CC1(C)C=CC(C1)C=O</chem>      | Essential oil [28]                      |
| 81                           | Myrtenol                                                            | <chem>CC1(C)C=CC(C1)CO</chem>       | Essential oil [10]                      |
| 82                           | Nerol oxide                                                         | <chem>CC1=CC=C(C1O)C=C</chem>       | Essential oil [28, 29]                  |
| 83                           | Perilla aldehyde                                                    | <chem>CC1=CC=CC=C1C=O</chem>        | Essential oil [19, 28]                  |
| 84                           | $\alpha$ -Phellandrene                                              | <chem>CC1=CC=CC=C1C=C</chem>        | Essential oil [10, 19, 30]              |

| MONOTERPENES AND DERIVATIVES |                                     |                                        |                                         |
|------------------------------|-------------------------------------|----------------------------------------|-----------------------------------------|
| Compound                     | Formula                             | Structure                              | Part of <i>Dittrichia graveolens</i> L. |
| 85                           | $\beta$ -Phellandrene               | <chem>C1=CC=C(C=C1)C(C)C</chem>        | Essential oil [19]                      |
| 86                           | $\alpha$ -Pinene                    | <chem>CC1=C(C)CC2=C1C(=C)C(C)C2</chem> | Essential oil [10, 19, 22-24, 26-30]    |
| 87                           | $\beta$ -Pinene                     | <chem>CC1=C(C)CC2=C1C(=C)C(C)C2</chem> | Essential oil [10, 19-24, 28-30]        |
| 88                           | Piperitone                          | <chem>CC(C)C1=CC(=O)C=C(C)C1</chem>    | Essential oil [19, 28]                  |
| 89                           | Sabinene                            | <chem>CC1=CC2(C)CC1(C)C2</chem>        | Essential oil [26]                      |
| 90                           | Santolina alcohol                   | <chem>CC(C)(O)C=C(C)C=C(C)C</chem>     | Essential oil [19, 29]                  |
| 91                           | Santolinatriene                     | <chem>CC(C)=CC=C(C)C=C(C)C</chem>      | Essential oil [19, 29]                  |
| 92                           | Terpinen-4-ol<br>(syn. Terpin-4-ol) | <chem>CC(C)(O)C1=CC=CC=C1C</chem>      | Essential oil [10, 19, 20]              |
| 93                           | $\alpha$ -Terpinene                 | <chem>CC1=CC=CC=C1C</chem>             | Essential oil [19, 29]                  |

| MONOTERPENES AND DERIVATIVES |                                                   |                                   |                                                                                      |                                            |
|------------------------------|---------------------------------------------------|-----------------------------------|--------------------------------------------------------------------------------------|--------------------------------------------|
|                              | Compound                                          | Formula                           | Structure                                                                            | Part of <i>Dittrichia graveolens</i> L.    |
| 94                           | $\gamma$ -Terpinene                               | C <sub>10</sub> H <sub>16</sub>   | 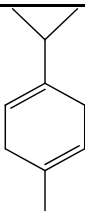   | Essential oil [10, 19, 23, 25, 29]         |
| 95                           | $\alpha$ -Terpineol                               | C <sub>10</sub> H <sub>18</sub> O |    | Essential oil [10, 16, 19, 21, 22, 28, 30] |
| 96                           | Terpinolene                                       | C <sub>10</sub> H <sub>16</sub>   |   | Essential oil [19, 23, 29]                 |
| 97                           | <i>trans</i> -Thujone<br>(syn. $\alpha$ -Thujone) | C <sub>10</sub> H <sub>16</sub> O |  | Essential oil [20]                         |
| 98                           | $\beta$ -Thujone                                  | C <sub>10</sub> H <sub>16</sub> O |  | Essential oil [29, 30]                     |
| 99                           | Thymol                                            | C <sub>10</sub> H <sub>14</sub> O |  | Essential oil [19, 24, 28, 30]             |
| 100                          | Thymol, methyl ether                              | C <sub>11</sub> H <sub>16</sub> O |  | Essential oil [20, 23]                     |

| MONOTERPENES AND DERIVATIVES |                                                                          |                       |                                                   |
|------------------------------|--------------------------------------------------------------------------|-----------------------|---------------------------------------------------|
| Compound                     | Formula                                                                  | Structure             | Part of <i>Dittrichia graveolens</i> L.           |
| 101                          | Vestitenone                                                              | <chem>C12H18O</chem>  | Essential oil [25]                                |
| 102                          | <i>trans</i> -Vetrocital C                                               | <chem>C9H14O</chem>   | Supercritical fluid extraction (SFE) extract [25] |
| SESQUITERPENES               |                                                                          |                       |                                                   |
| Compound                     | Formula                                                                  | Structure             | Part of <i>Dittrichia graveolens</i> L.           |
| 103                          | 1H-Cycloprop[e]azulene, 1a,2,3,4,4a,5,6,7β-octahydro-1,1,4,7-tetramethyl | <chem>C15H24</chem>   | Essential oil [20]                                |
| 104                          | 4,5-di- <i>epi</i> -Aristolochene                                        | <chem>C15H24</chem>   | Essential oil [19, 20, 28]                        |
| 105                          | Aromadendrene                                                            | <chem>C15H24</chem>   | Essential oil [20, 26]                            |
| 106                          | <i>allo</i> -Aromadendrene                                               | <chem>C15H24</chem>   | Essential oil [19, 20, 26, 27, 29]                |
| 107                          | Bigelovin                                                                | <chem>C18H22O4</chem> | Epigeal parts extracts [13]                       |

| SESQUITERPENES |                     |                      |                                         |
|----------------|---------------------|----------------------|-----------------------------------------|
| Compound       | Formula             | Structure            | Part of <i>Dittrichia graveolens</i> L. |
| 108            | $\alpha$ -Bisabolol | <chem>C15H26O</chem> | Essential oil [28]                      |
| 109            | Cadalene            | <chem>C15H18</chem>  | Essential oil [19]                      |
| 110            | Cadina-1,4-diene    | <chem>C15H24</chem>  | Essential oil [19]                      |
| 111            | $\alpha$ -Cadinene  | <chem>C15H24</chem>  | Essential oil [19, 21, 29]              |
| 112            | $\gamma$ -Cadinene  | <chem>C15H24</chem>  | Essential oil [19, 22, 23, 29]          |
| 113            | $\delta$ -Cadinene  | <chem>C15H24</chem>  | Essential oil [19, 20, 24, 26, 29, 30]  |
| 114            | $\alpha$ -Cadinol   | <chem>C15H26O</chem> | Essential oil [19]                      |

| SESQUITERPENES |                                                          |                                                |                                                                                      |                                                                         |
|----------------|----------------------------------------------------------|------------------------------------------------|--------------------------------------------------------------------------------------|-------------------------------------------------------------------------|
|                | Compound                                                 | Formula                                        | Structure                                                                            | Part of <i>Dittrichia graveolens</i> L.                                 |
| 115            | $\delta$ -Cadinol                                        | C <sub>15</sub> H <sub>26</sub> O              | 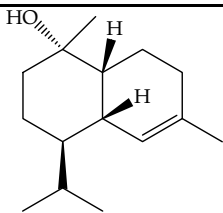   | Essential oil [24]                                                      |
| 116            | $\tau$ -Cadinol<br>(syn. <i>epi</i> - $\alpha$ -Cadinol) | C <sub>15</sub> H <sub>26</sub> O              |    | Essential oil [19, 20, 23, 26, 27, 29, 30]                              |
| 117            | $\alpha$ -Calacorene                                     | C <sub>15</sub> H <sub>20</sub>                |    | Essential oil [19]                                                      |
| 118            | $\beta$ -Calacorene                                      | C <sub>15</sub> H <sub>20</sub>                |  | Essential oil [19]                                                      |
| 119            | <i>cis</i> -Calamenene                                   | C <sub>15</sub> H <sub>22</sub>                |  | Essential oil [19]                                                      |
| 120            | <i>trans</i> -Calamenene                                 | C <sub>15</sub> H <sub>22</sub>                |  | Essential oil [19]                                                      |
| 121            | Camphor, juniper                                         | C <sub>15</sub> H <sub>26</sub> O              |  | Essential oil [25]<br>Supercritical fluid extraction (SFE) extract [25] |
| 122            | Carabrone                                                | C <sub>15</sub> H <sub>20</sub> O <sub>3</sub> |  | Aerial parts [17]                                                       |



| SESQUITERPENES |                                                                                |                                                |                                                                                      |                                                                                               |
|----------------|--------------------------------------------------------------------------------|------------------------------------------------|--------------------------------------------------------------------------------------|-----------------------------------------------------------------------------------------------|
|                | Compound                                                                       | Formula                                        | Structure                                                                            | Part of <i>Dittrichia graveolens</i> L.                                                       |
| 123            | Carabrone, 4H                                                                  | C <sub>15</sub> H <sub>22</sub> O <sub>3</sub> | 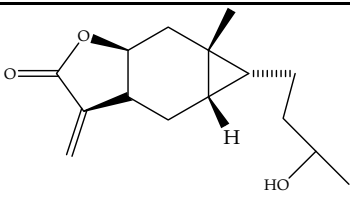   | Aerial parts [17]                                                                             |
| 124            | Caryophylla-4(12),8(13)-dien-5α-ol                                             | C <sub>15</sub> H <sub>24</sub> O              |    | Essential oil [20]                                                                            |
| 125            | Caryophylla-4(14),8(15)-dien-5α-ol                                             | C <sub>15</sub> H <sub>26</sub> O              |    | Essential oil [19]                                                                            |
| 126            | Caryophyllene alcohol (syn. Apollanol)                                         | C <sub>15</sub> H <sub>26</sub> O              |   | Essential oil [19]                                                                            |
| 127            | Caryophyllene epoxide                                                          | C <sub>15</sub> H <sub>24</sub> O              |  | Essential oil [19]                                                                            |
| 128            | Caryophyllene oxide                                                            | C <sub>15</sub> H <sub>24</sub> O              |  | Essential oil [20, 21, 23-30]<br>Supercritical fluid extraction (SFE) extract [25]            |
| 129            | <i>trans</i> -Caryophyllene (syn. β-Caryophyllene, ( <i>E</i> )-Caryophyllene) | C <sub>15</sub> H <sub>24</sub>                |  | Essential oil [10, 19, 20, 22-24, 27-30]<br>Supercritical fluid extraction (SFE) extract [25] |
| 130            | γ-Caryophyllene (syn. <i>iso</i> Caryophyllene)                                | C <sub>15</sub> H <sub>24</sub>                |  | Essential oil [19, 29]                                                                        |

| SESQUITERPENES |                                                           |                                                |                                                                                      |                                                                             |
|----------------|-----------------------------------------------------------|------------------------------------------------|--------------------------------------------------------------------------------------|-----------------------------------------------------------------------------|
|                | Compound                                                  | Formula                                        | Structure                                                                            | Part of <i>Dittrichia graveolens</i> L.                                     |
| 131            | 9- <i>epi</i> - $\beta$ -Caryophyllene, 14-hydroxy        | C <sub>15</sub> H <sub>24</sub> O              | 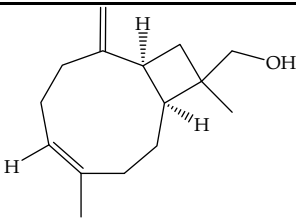   | Essential oil [29]                                                          |
| 132            | 9- <i>epi</i> -( <i>E</i> )-Caryophyllene                 | C <sub>15</sub> H <sub>24</sub>                |    | Essential oil [25]<br>Supercritical fluid extraction (SFE) extract [25]     |
| 133            | Clovene                                                   | C <sub>15</sub> H <sub>24</sub>                |    | Essential oil [19]                                                          |
| 134            | Cedr-8(15)-en-9- $\alpha$ -ol                             | C <sub>15</sub> H <sub>24</sub> O              |   | Essential oil [23, 25]<br>Supercritical fluid extraction (SFE) extract [25] |
| 135            | $\alpha$ -Copaene                                         | C <sub>15</sub> H <sub>24</sub>                |  | Essential oil [19]                                                          |
| 136            | Costic acid                                               | C <sub>15</sub> H <sub>22</sub> O <sub>2</sub> |  | Aerial parts [17]<br>Epigeal parts extracts [13]                            |
| 137            | Costic acid, 10-isobutyryloxy-8,9-epoxythymol isobutyrate | C <sub>15</sub> H <sub>22</sub> O <sub>4</sub> |  | Aerial parts [15]<br>Essential oil [19]                                     |
| 138            | Costic acid, 1 $\beta$ -hydroxy                           | C <sub>15</sub> H <sub>22</sub> O <sub>3</sub> |  | Aerial parts [17]                                                           |
| 139            | Costic acid, 2 $\alpha$ -hydroxy                          | C <sub>15</sub> H <sub>22</sub> O <sub>3</sub> |  | Aerial parts [17]<br>Epigeal parts extracts [13]                            |

| SESQUITERPENES |                                                           |                       |                                         |                                                                             |
|----------------|-----------------------------------------------------------|-----------------------|-----------------------------------------|-----------------------------------------------------------------------------|
| Compound       | Formula                                                   | Structure             | Part of <i>Dittrichia graveolens</i> L. |                                                                             |
| 140            | Costic acid, 2 $\alpha$ -hydroxy-3,4-dehydro-4,15-dihydro | <chem>C15H22O3</chem> |                                         | Leaves [14]                                                                 |
| 141            | Costic acid, 3 $\alpha$ -hydroxy (syn. Viscic acid)       | <chem>C15H22O3</chem> |                                         | Aerial parts [17]<br>Epigeal parts extracts [13]<br>Leaves [14]             |
| 142            | <i>iso</i> Costic acid                                    | <chem>C15H22O2</chem> |                                         | Aerial parts [17]<br>Epigeal parts extracts [13]<br>Essential oil [19]      |
| 143            | $\beta$ -Cubebene                                         | <chem>C15H24</chem>   |                                         | Essential oil [24]                                                          |
| 144            | 1,10-di- <i>epi</i> Cubenol                               | <chem>C15H26O</chem>  |                                         | Essential oil [23, 25]<br>Supercritical fluid extraction (SFE) extract [25] |
| 145            | $\alpha$ -Cyperone                                        | <chem>C15H22O</chem>  |                                         | Essential oil [19, 30]                                                      |
| 146            | Diketone                                                  | <chem>C15H20O4</chem> |                                         | Aerial parts [15]                                                           |
| 147            | Eudesm, 3 $\alpha$ -hydroxy-4-en-12,6 $\beta$ -olide      | <chem>C15H20O3</chem> |                                         | Aerial parts [17]                                                           |

| SESQUITERPENES |                                     |                       |                                                                                      | Part of <i>Dittrichia graveolens</i> L.                                 |
|----------------|-------------------------------------|-----------------------|--------------------------------------------------------------------------------------|-------------------------------------------------------------------------|
| Compound       | Formula                             | Structure             |                                                                                      |                                                                         |
| 148            | Eudesma, 12-carboxy,3,11(13)-diene  | <chem>C15H22O2</chem> | 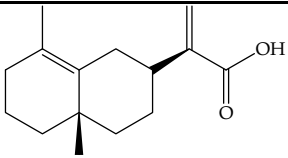   | Leaves [14]                                                             |
| 149            | 6-Eudesmen-4- $\alpha$ -ol          | <chem>C15H26O</chem>  |    | Essential oil [19]                                                      |
| 150            | $\alpha$ -Eudesmol                  | <chem>C15H26O</chem>  |    | Essential oil [25]<br>Supercritical fluid extraction (SFE) extract [25] |
| 151            | $\beta$ -Eudesmol                   | <chem>C15H26O</chem>  |   | Essential oil [19]                                                      |
| 152            | ( <i>E</i> )- $\beta$ -Farnesene    | <chem>C15H24</chem>   |  | Essential oil [28]                                                      |
| 153            | ( <i>E,E</i> )- $\alpha$ -Farnesene | <chem>C15H24</chem>   |  | Essential oil [25]<br>Supercritical fluid extraction (SFE) extract [25] |
| 154            | $\beta$ - <i>trans</i> -Farnesene   | <chem>C15H24</chem>   |  | Essential oil [26]                                                      |
| 155            | (2 <i>E</i> ,6 <i>E</i> )-Farnesol  | <chem>C15H26O</chem>  |  | Essential oil [29, 30]                                                  |
| 156            | Germacrene-D                        | <chem>C15H24</chem>   |  | Essential oil [20, 29]                                                  |

| SESQUITERPENES |                          |                                                |                                                                                      |                                                                         |
|----------------|--------------------------|------------------------------------------------|--------------------------------------------------------------------------------------|-------------------------------------------------------------------------|
|                | Compound                 | Formula                                        | Structure                                                                            | Part of <i>Dittrichia graveolens</i> L.                                 |
| 157            | Globulol                 | C <sub>15</sub> H <sub>26</sub> O              | 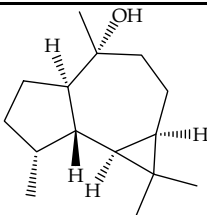   | Essential oil [25]<br>Supercritical fluid extraction (SFE) extract [25] |
| 158            | Graveolide               | C <sub>15</sub> H <sub>20</sub> O <sub>3</sub> |    | Epigeal parts extracts [13]                                             |
| 159            | <i>trans</i> -β-Guaiene  | C <sub>15</sub> H <sub>24</sub>                |    | Essential oil [25]<br>Supercritical fluid extraction (SFE) extract [25] |
| 160            | α-Guaiene                | C <sub>15</sub> H <sub>24</sub>                |   | Essential oil [23, 29]                                                  |
| 161            | Guaiol acetate           | C <sub>17</sub> H <sub>28</sub> O <sub>2</sub> |  | Essential oil [25]<br>Supercritical fluid extraction (SFE) extract [25] |
| 162            | α-Gurjunene              | C <sub>15</sub> H <sub>24</sub>                |  | Essential oil [29]                                                      |
| 163            | γ-Gurjunene              | C <sub>15</sub> H <sub>24</sub>                |  | Essential oil [25]<br>Supercritical fluid extraction (SFE) extract [25] |
| 164            | 8- <i>epi</i> -Helenalin | C <sub>15</sub> H <sub>18</sub> O <sub>4</sub> |  | Epigeal parts extracts [13]                                             |

| SESQUITERPENES |                                                |                                                |                                                                                      |                                                                             |
|----------------|------------------------------------------------|------------------------------------------------|--------------------------------------------------------------------------------------|-----------------------------------------------------------------------------|
|                | Compound                                       | Formula                                        | Structure                                                                            | Part of <i>Dittrichia graveolens</i> L.                                     |
| 165            | $\gamma$ -Himachalene                          | C <sub>15</sub> H <sub>24</sub>                | 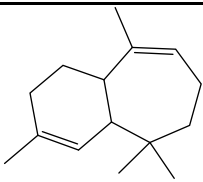   | Essential oil [25]<br><br>Supercritical fluid extraction (SFE) extract [25] |
| 166            | Himachalol                                     | C <sub>15</sub> H <sub>26</sub> O              |    | Essential oil [25]<br><br>Supercritical fluid extraction (SFE) extract [25] |
| 167            | Humulene                                       | C <sub>15</sub> H <sub>24</sub>                |    | Essential oil [24]                                                          |
| 168            | $\alpha$ -Humulene                             | C <sub>15</sub> H <sub>24</sub>                |   | Essential oil [10, 19, 23, 24, 27-30]                                       |
| 169            | Ilicic acid                                    | C <sub>15</sub> H <sub>24</sub> O <sub>3</sub> |  | Aerial parts [17]<br><br>Epigeal parts extracts [13]                        |
| 170            | Ilicic acid methyl ester (syn. Vachanic acid)  | C <sub>16</sub> H <sub>26</sub> O <sub>3</sub> |  | Leaves [14]<br><br>Epigeal parts extracts [13]                              |
| 171            | Ilicic acid methyl ester, 3 $\alpha$ -hydroxy  | C <sub>16</sub> H <sub>26</sub> O <sub>4</sub> |  | Epigeal parts extracts [13]                                                 |
| 172            | Ilicic acid methyl ester, 3 $\alpha$ -acetyl   | C <sub>18</sub> H <sub>28</sub> O <sub>5</sub> |  | Epigeal parts extracts [13]                                                 |
| 173            | Ilicic acid, 2 $\alpha$ -hydroxy-4- <i>epi</i> | C <sub>15</sub> H <sub>24</sub> O <sub>4</sub> |  | Epigeal parts extracts [13]                                                 |

| SESQUITERPENES |                                                |                                                |                                                                                      |                                         |
|----------------|------------------------------------------------|------------------------------------------------|--------------------------------------------------------------------------------------|-----------------------------------------|
|                | Compound                                       | Formula                                        | Structure                                                                            | Part of <i>Dittrichia graveolens</i> L. |
| 174            | Ilicic acid, 3 $\alpha$ -hydroxy               | C <sub>15</sub> H <sub>24</sub> O <sub>4</sub> | 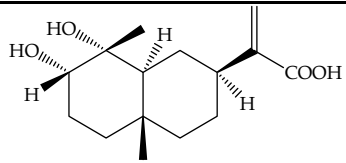   | Epigeal parts extracts [13]             |
| 175            | Ilicic acid, 3 $\alpha$ -hydroxy-4- <i>epi</i> | C <sub>14</sub> H <sub>22</sub> O <sub>4</sub> |    | Epigeal parts extracts [13]             |
| 176            | <i>neo</i> Intermedeol                         | C <sub>15</sub> H <sub>26</sub> O              |    | Essential oil [20, 30]                  |
| 177            | Ivalin                                         | C <sub>15</sub> H <sub>20</sub> O <sub>3</sub> |   | Aerial parts [34]                       |
| 178            | Ivalin, acetate (syn. Acetylivalin)            | C <sub>17</sub> H <sub>22</sub> O <sub>4</sub> |  | Aerial parts [34]                       |
| 179            | Manool                                         | C <sub>20</sub> H <sub>34</sub> O              |  | Essential oil [30]                      |
| 180            | $\alpha$ -Muurolene                            | C <sub>15</sub> H <sub>24</sub>                |  | Essential oil [10, 19, 23, 29]          |
| 181            | $\gamma$ -Muurolene                            | C <sub>15</sub> H <sub>24</sub>                |  | Essential oil [19, 23, 30]              |

| SESQUITERPENES |                                                            |                                                |                                                                                      |                                                                                     |
|----------------|------------------------------------------------------------|------------------------------------------------|--------------------------------------------------------------------------------------|-------------------------------------------------------------------------------------|
|                | Compound                                                   | Formula                                        | Structure                                                                            | Part of <i>Dittrichia graveolens</i> L.                                             |
| 182            | $\tau$ -Muurolol<br>(syn. <i>epi</i> - $\alpha$ -Muurolol) | C <sub>15</sub> H <sub>26</sub> O              | 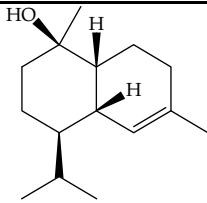   | Essential oil [19, 29, 30]                                                          |
| 183            | Oplopanone                                                 | C <sub>15</sub> H <sub>26</sub> O <sub>2</sub> |    | Supercritical fluid extraction (SFE) extract [25]                                   |
| 184            | Presilphiperfol-7-ene                                      | C <sub>15</sub> H <sub>24</sub>                |    | Essential oil [19]                                                                  |
| 185            | Selin-11-en-4- $\alpha$ -ol                                | C <sub>15</sub> H <sub>26</sub> O              |   | Essential oil [19, 23, 25, 28]<br>Supercritical fluid extraction (SFE) extract [25] |
| 186            | $\beta$ -Selinene                                          | C <sub>15</sub> H <sub>24</sub>                |  | Essential oil [19, 27, 28, 30]                                                      |
| 187            | ( <i>E</i> )-Sesquilavandulol                              | C <sub>15</sub> H <sub>26</sub> O              |  | Essential oil [25]<br>Supercritical fluid extraction (SFE) extract [25]             |
| 188            | ( <i>E</i> )-Sesquilavandulyl acetate                      | C <sub>17</sub> H <sub>28</sub> O <sub>2</sub> |  | Essential oil [28]                                                                  |
| 189            | Tomentosin<br>(syn. Xanthalongin)                          | C <sub>15</sub> H <sub>20</sub> O <sub>3</sub> |  | Aerial parts [17]<br>Epigeal parts extracts [13]<br>Leaves [14]                     |



| SESQUITERPENES |                                                |                                                |                                                                                      |                                                                         |
|----------------|------------------------------------------------|------------------------------------------------|--------------------------------------------------------------------------------------|-------------------------------------------------------------------------|
|                | Compound                                       | Formula                                        | Structure                                                                            | Part of <i>Dittrichia graveolens</i> L.                                 |
| 190            | 8- <i>epi</i> Tomentosin                       | C <sub>15</sub> H <sub>20</sub> O <sub>3</sub> | 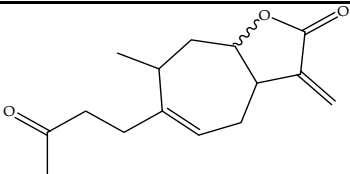   | Aerial parts [15]                                                       |
| 191            | 10- <i>epi</i> Tomentosin                      | C <sub>15</sub> H <sub>20</sub> O <sub>3</sub> |    | Leaves [14]                                                             |
| 192            | Tomentosin derivative                          | C <sub>17</sub> H <sub>26</sub> O <sub>4</sub> |    | Leaves [14]                                                             |
| 193            | Tomentosin, 11 $\alpha$ ,13-dihydro derivative | C <sub>15</sub> H <sub>22</sub> O <sub>3</sub> |   | Leaves [14]                                                             |
| 194            | Tomentosin, 11 $\beta$ ,13-dihydro derivative  | C <sub>15</sub> H <sub>22</sub> O <sub>3</sub> |  | Leaves [14]                                                             |
| 195            | Tomentosin, 4H                                 | C <sub>15</sub> H <sub>22</sub> O <sub>3</sub> |  | Aerial parts [17]<br>Epigeal parts extracts [13]                        |
| 196            | Valencene                                      | C <sub>15</sub> H <sub>24</sub>                |  | Essential oil [23]                                                      |
| 197            | Viridiflorol                                   | C <sub>15</sub> H <sub>26</sub> O              |  | Essential oil [25]<br>Supercritical fluid extraction (SFE) extract [25] |
| 198            | Xanthalongin, 2 $\alpha$ -hydroxy-2 <i>R</i>   | C <sub>15</sub> H <sub>20</sub> O <sub>4</sub> |  | Epigeal parts extracts [13]                                             |

## SESQUITERPENES

| Compound                                                                                       | Formula                                        | Structure                                                                          | Part of <i>Dittrichia graveolens</i> L. |
|------------------------------------------------------------------------------------------------|------------------------------------------------|------------------------------------------------------------------------------------|-----------------------------------------|
| <b>199</b> Xanthatin, 8- <i>epi</i> -1 $\beta$ , 5 $\beta$ -epoxide, 11, 13-dihydro derivative | C <sub>15</sub> H <sub>18</sub> O <sub>4</sub> | 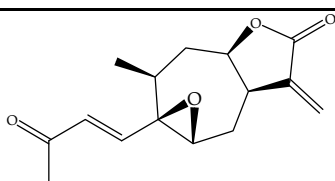 | Leaves [14]                             |
| <b>200</b> Zonarene                                                                            | C <sub>15</sub> H <sub>24</sub>                |  | Essential oil [19]                      |

## GUAIANOLIDES AND PSEUDOGUAIANOLIDES

| Compound                                                                                          | Formula                                        | Structure                                                                            | Part of <i>Dittrichia graveolens</i> L. |
|---------------------------------------------------------------------------------------------------|------------------------------------------------|--------------------------------------------------------------------------------------|-----------------------------------------|
| <b>201</b> 3,4 $\alpha$ , 8-trimethyl dodecahydro azuleno[6,5- $\beta$ ]furan-2,5-dione           | C <sub>15</sub> H <sub>22</sub> O <sub>3</sub> | 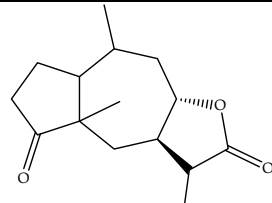  | Aerial parts [35]                       |
| <b>202</b> Carboxylic acid, 7,7-dimethyl-6-methylidenetricyclo[6.2.1.0 <sup>1,5</sup> ]undecane-2 | C <sub>15</sub> H <sub>22</sub> O <sub>2</sub> |  | aerial parts [36]                       |
| <b>203</b> Confertin                                                                              | C <sub>16</sub> H <sub>24</sub> O <sub>4</sub> |  | Aerial parts [15]                       |
| <b>204</b> Inuviscolide                                                                           | C <sub>15</sub> H <sub>20</sub> O <sub>3</sub> |  | Leaves [14]                             |
| <b>205</b> Inuviscolide, 11 $\beta$ , 13-dihydro                                                  | C <sub>15</sub> H <sub>22</sub> O <sub>3</sub> |  | Aerial parts [15]                       |

## GUAIANOLIDES AND PSEUDOGUAIANOLIDES

| Compound                                        | Formula           | Structure                                                                            | Part of <i>Dittrichia graveolens</i> L. |
|-------------------------------------------------|-------------------|--------------------------------------------------------------------------------------|-----------------------------------------|
| 206 4- <i>epi-iso</i> Inuviscolide              | $C_{15}H_{20}O_3$ | 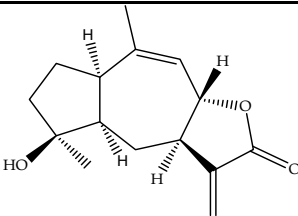   | Epigeal parts extracts [13]             |
| 207 Inuviscolide, 4 $\alpha$ ,5 $\alpha$ -epoxy | $C_{15}H_{20}O_3$ |    | Aerial parts [17]                       |
| 208 Inuviscolide, l-epimer                      | $C_{15}H_{20}O_3$ |   | Aerial parts [15]                       |
| 209 Inuviscotide, 11 $\beta$ ,13-dihydro        | $C_{15}H_{22}O_3$ |  | Aerial parts [15]                       |
| 210 Pseudoguaianolide 4                         | $C_{15}H_{22}O_3$ |  | Aerial parts [15]                       |
| 211 Pseudoguaianolide 5                         | $C_{15}H_{22}O_3$ |  | Aerial parts [15]                       |

## ORGANIC COMPOUNDS

| Compound         | Formula   | Structure                                                                            | Part of <i>Dittrichia graveolens</i> L. |
|------------------|-----------|--------------------------------------------------------------------------------------|-----------------------------------------|
| 212 Benzaldehyde | $C_7H_6O$ | 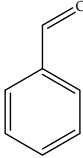 | Essential oil [28, 29]                  |

| ORGANIC COMPOUNDS |                                       |                                                |                                                                                      | Part of <i>Dittrichia graveolens</i> L. |
|-------------------|---------------------------------------|------------------------------------------------|--------------------------------------------------------------------------------------|-----------------------------------------|
| Compound          | Formula                               | Structure                                      |                                                                                      |                                         |
| 213               | Benzene acetaldehyde                  | C <sub>8</sub> H <sub>8</sub> O                | 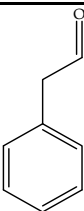   | Essential oil [28]                      |
| 214               | Benzoate, 2-methylbutyl               | C <sub>12</sub> H <sub>16</sub> O <sub>2</sub> |    | Essential oil [28]                      |
| 215               | Benzoate, isobutyl                    | C <sub>11</sub> H <sub>14</sub> O <sub>2</sub> |   | Essential oil [28]                      |
| 216               | <i>trans</i> -Chrys aenthemyl alcohol | C <sub>10</sub> H <sub>18</sub> O              |  | Essential oil [19]                      |
| 217               | ( <i>E,E</i> )-2,4-Decadienal         | C <sub>10</sub> H <sub>16</sub> O              |  | Essential oil [19, 29]                  |
| 218               | <i>n</i> -Decanal                     | C <sub>10</sub> H <sub>20</sub> O              |  | Essential oil [28]                      |
| 219               | ( <i>E</i> )-2-Decenal                | C <sub>10</sub> H <sub>18</sub> O              |  | Essential oil [19]                      |
| 220               | Docosane                              | C <sub>22</sub> H <sub>46</sub>                |  | Essential oil [19]                      |
| 221               | Dodecane                              | C <sub>12</sub> H <sub>26</sub>                |  | Essential oil [10]                      |
| 222               | Eicosane                              | C <sub>20</sub> H <sub>42</sub>                |  | Essential oil [19]                      |
| 223               | 3-Eicosyne                            | C <sub>20</sub> H <sub>38</sub>                |                                                                                      | Essential oil [30]                      |

| ORGANIC COMPOUNDS |                                 |                                                |           |                                                   |
|-------------------|---------------------------------|------------------------------------------------|-----------|---------------------------------------------------|
|                   | Compound                        | Formula                                        | Structure | Part of <i>Dittrichia graveolens</i> L.           |
|                   |                                 |                                                |           |                                                   |
| 224               | Furfural                        | C <sub>5</sub> H <sub>4</sub> O <sub>2</sub>   |           | Essential oil [28]                                |
| 225               | Geranial                        | C <sub>10</sub> H <sub>16</sub> O              |           | Supercritical fluid extraction (SFE) extract [25] |
| 226               | Heneicosane                     | C <sub>21</sub> H <sub>44</sub>                |           | Essential oil [19]                                |
| 227               | ( <i>E,E</i> )-Hepta-2,4-dienal | C <sub>7</sub> H <sub>10</sub> O               |           | Essential oil [28]                                |
| 228               | Heptadecane                     | C <sub>17</sub> H <sub>36</sub>                |           | Essential oil [19, 30]                            |
| 229               | ( <i>E</i> )-Hex-2-enal         | C <sub>6</sub> H <sub>10</sub> O               |           | Essential oil [28]                                |
| 230               | ( <i>Z</i> )-Hex-3-enyl tiglate | C <sub>11</sub> H <sub>18</sub> O <sub>2</sub> |           | Essential oil [28]                                |
| 231               | Hexacosane                      | C <sub>26</sub> H <sub>54</sub>                |           | Essential oil [19]                                |
| 232               | Hexadecane                      | C <sub>16</sub> H <sub>34</sub>                |           | Essential oil [19]                                |
| 233               | <i>n</i> -Hexanal               | C <sub>6</sub> H <sub>12</sub> O               |           | Essential oil [28]                                |
| 234               | <i>cis</i> -3-Hexenyl benzoate  | C <sub>13</sub> H <sub>16</sub> O <sub>2</sub> |           | Essential oil [26]                                |

| ORGANIC COMPOUNDS |                                |                                                |                                                                                      |                                                                             |
|-------------------|--------------------------------|------------------------------------------------|--------------------------------------------------------------------------------------|-----------------------------------------------------------------------------|
|                   | Compound                       | Formula                                        | Structure                                                                            | Part of <i>Dittrichia graveolens</i> L.                                     |
| 235               | Lavandulyl isovalerate         | C <sub>15</sub> H <sub>26</sub> O <sub>2</sub> | 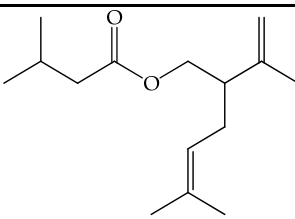   | Supercritical fluid extraction (SFE) extract [25]                           |
| 236               | 3-Methylbut-2-enal             | C <sub>5</sub> H <sub>10</sub>                 |    | Essential oil [28]                                                          |
| 237               | 6-Methylhept-5-en-2-one        | C <sub>8</sub> H <sub>14</sub> O               |    | Essential oil [28]                                                          |
| 238               | ( <i>E</i> )-Nerolidol         | C <sub>15</sub> H <sub>26</sub> O              |    | Essential oil [19, 25]<br>Supercritical fluid extraction (SFE) extract [25] |
| 239               | ( <i>Z</i> )-Nerolidol acetate | C <sub>16</sub> H <sub>26</sub> O <sub>2</sub> |   | Essential oil [25]<br>Supercritical fluid extraction (SFE) extract [25]     |
| 240               | Neryl acetate                  | C <sub>12</sub> H <sub>20</sub> O <sub>2</sub> |  | Essential oil [23]                                                          |
| 241               | Nonadecane                     | C <sub>19</sub> H <sub>40</sub>                |  | Essential oil [19]                                                          |
| 242               | <i>n</i> -Nonanal              | C <sub>9</sub> H <sub>18</sub> O               |  | Essential oil [28, 29]                                                      |
| 243               | 3-Nonanone                     | C <sub>9</sub> H <sub>18</sub> O               |  | Essential oil [20]                                                          |
| 244               | ( <i>E</i> )-β-Ocimene         | C <sub>10</sub> H <sub>16</sub>                |  | Essential oil [19]                                                          |
| 245               | Octadecane                     | C <sub>18</sub> H <sub>38</sub>                |  | Essential oil [19]                                                          |
| 246               | Octanol acetate                | C <sub>10</sub> H <sub>20</sub> O <sub>2</sub> |  | Supercritical fluid extraction (SFE) extract [25]                           |
| 247               | Pentacosane                    | C <sub>25</sub> H <sub>52</sub>                |  | Essential oil [19]                                                          |

| ORGANIC COMPOUNDS |                                             |                                                |                                                                                      |                                                                             |
|-------------------|---------------------------------------------|------------------------------------------------|--------------------------------------------------------------------------------------|-----------------------------------------------------------------------------|
|                   | Compound                                    | Formula                                        | Structure                                                                            | Part of <i>Dittrichia graveolens</i> L.                                     |
| 248               | Pentadecanal                                | C <sub>15</sub> H <sub>30</sub> O              |    | Essential oil [30]                                                          |
| 249               | Pentadecanone, 6,10,14-trimethyl-2          | C <sub>18</sub> H <sub>36</sub> O              |    | Essential oil [30]                                                          |
| 250               | Stearate, 2-( <i>p</i> -hydroxyphenyl)ethyl | C <sub>26</sub> H <sub>44</sub> O <sub>3</sub> |    | Aerial parts [17]                                                           |
| 251               | Tetracosane                                 | C <sub>24</sub> H <sub>50</sub>                |    | Essential oil [19]                                                          |
| 252               | Tetradecane                                 | C <sub>14</sub> H <sub>30</sub>                |    | Essential oil [19, 28]                                                      |
| 253               | <i>m</i> -Tolualdehyde                      | C <sub>8</sub> H <sub>8</sub> O                |   | Essential oil [28]                                                          |
| 254               | Tricosane                                   | C <sub>23</sub> H <sub>48</sub>                |  | Essential oil [19]                                                          |
| 255               | Tridecane                                   | C <sub>13</sub> H <sub>28</sub>                |  | Essential oil [10, 19]                                                      |
| 256               | Undecane                                    | C <sub>11</sub> H <sub>24</sub>                |  | Essential oil [10]                                                          |
| 257               | Yomogi alcohol                              | C <sub>10</sub> H <sub>18</sub> O              |  | Essential oil [19]                                                          |
| OTHER COMPOUNDS   |                                             |                                                |                                                                                      |                                                                             |
|                   | Compound                                    | Formula                                        | Structure                                                                            | Part of <i>Dittrichia graveolens</i> L.                                     |
| 258               | Crypto-acorone                              | C <sub>15</sub> H <sub>24</sub> O <sub>2</sub> |  | Essential oil [25]<br><br>Supercritical fluid extraction (SFE) extract [25] |

| OTHER COMPOUNDS                                       |                   |                                                                                    |  | Part of <i>Dittrichia graveolens</i> L.                                     |
|-------------------------------------------------------|-------------------|------------------------------------------------------------------------------------|--|-----------------------------------------------------------------------------|
| Compound                                              | Formula           | Structure                                                                          |  |                                                                             |
| <b>259</b> Cyclopentadecanolide                       | $C_{15}H_{28}O_2$ | 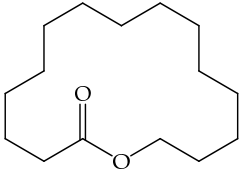 |  | Essential oil [25]<br><br>Supercritical fluid extraction (SFE) extract [25] |
| <b>261</b> 8- $\alpha$ -11-Elemodiol                  | $C_{14}H_{24}O_2$ |  |  | Essential oil [25]<br><br>Supercritical fluid extraction (SFE) extract [25] |
| <b>262</b> 8-(1-Methylethylidene)bicyclo[5.1.0]octane | $C_{11}H_{18}$    |  |  | Essential oil [20]                                                          |
